# Supplementary material
Source: ML conference proceedings conference paper supplement (https://openreview.net/forum?id=ZyugLlWzdO)
Supplement: supplementary_material [file attachment]

---

# Is Heterophily A Real Nightmare For Graph Neural Networks To Do Node Classification?

---

Anonymous Author(s)

Affiliation

Address

email

## Abstract

Graph Neural Networks (GNNs) extend basic Neural Networks (NNs) by using the graph structures based on the relational inductive bias (homophily assumption). Though GNNs are believed to outperform NNs in real-world tasks, performance advantages of GNNs over graph-agnostic NNs seem not generally satisfactory. Heterophily has been considered as a main cause and numerous works have been put forward to address it. In this paper, we first show that not all cases of heterophily are harmful for GNNs with aggregation operation. Then, we propose new metrics based on a similarity matrix which considers the influence of graph structure and input features on GNNs. The metrics demonstrate advantages over the commonly used homophily metrics by tests on synthetic graphs. From the metrics and the observations, we find some cases of harmful heterophily can be addressed by diversification operation. With this fact and knowledge of filterbanks, we propose the Adaptive Channel Mixing (ACM) framework to adaptively exploit aggregation, diversification and identity operations in each GNN layer to address harmful heterophily. We validate the ACM-augmented baselines with 11 real-world node classification tasks. They consistently achieve significant performance gain and exceed the state-of-the-art GNNs on most of the tasks without incurring significant computational burden.

## 1 Introduction

Deep Neural Networks (NNs) [19] have revolutionized many machine learning areas, including image recognition [18], speech recognition [11] and natural language processing [2], *etc.* One major strength is their capacity and effectiveness of learning latent representation from Euclidean data. Recently, the focus has been put on its applications on non-Euclidean data [4], *e.g.*, relational data or graphs. Combining graph signal processing and convolutional neural networks [20], numerous Graph Neural Networks (GNNs) [30, 7, 13, 31, 16, 25] have been proposed which empirically outperform traditional neural networks on graph-based machine learning tasks, *e.g.*, node classification, graph classification, link prediction and graph generation, *etc.* GNNs are built on the homophily assumption [27], *i.e.*, connected nodes tend to share similar attributes with each other [12], which offers additional information besides node features. Such relational inductive bias [3] is believed to be a key factor leading to GNNs' superior performance over NNs' in many tasks.

Nevertheless, growing evidence shows that GNNs do not always gain advantages over traditional NNs when dealing with relational data. In some cases, even simple Multi-Layer Perceptrons (MLPs) can outperform GNNs by a large margin [36, 23, 5]. An important reason for the performance degradation is believed to be the heterophily problem, *i.e.*, connected nodes tend to have different labels which makes the homophily assumption fail. Heterophily challenge has received attention recently and there are increasing number of models being put forward to address this problem [36, 23, 5, 35, 34].

**Contributions** In this paper, we first demonstrate that not all heterophilous graphs are harmful for aggregation-based GNNs and the existing metrics of homophily are insufficient to decide whether the aggregation operation will make nodes less distinguishable or not. By constructing a similarity matrix from backpropagation analysis, we derive new metrics to depict how much GNNs are influenced by the graph structure and node features. We show the advantage of our metrics over the existing metrics by comparing the ability of characterizing the performance of two baseline GNNs on synthetic graphs of different levels of homophily. From the similarity matrix, we find that diversification operation is able to address some harmful heterophily cases, and then based on which we propose Adaptive Channel Mixing (ACM) GNN framework. The experiments on the synthetic datasets, real-world datasets and the ablation studies consistently show that baseline GNN augmented by ACM framework is able to obtain significant performance boost on node classification tasks on heterophilous graphs.

The rest of this paper is mainly organized as follows: In section 2, we introduce the notation and the background knowledge. In section 3, we conduct node-wise heterophily analysis, derive new metrics based on a similarity matrix and conduct experiments to show their advantage. In section 4.3, we propose the ACM-GNN framework to adaptively utilize the information from different filterbank channels to address heterophily problem. In section 5, we discuss the related works and clarify the differences to our method. In section 6, we provide empirical evaluations on ACM framework, including ablation study and tests on 11 real-world node classification tasks.

## 2 Preliminaries

We introduce the related notation and background knowledge. We use **bold** fonts for vectors (*e.g.*,  $\mathbf{v}$ ). Suppose we have an undirected connected graph  $\mathcal{G} = (\mathcal{V}, \mathcal{E}, A)$ , where  $\mathcal{V}$  is the node set with  $|\mathcal{V}| = N$ ;  $\mathcal{E}$  is the edge set without self-loop;  $A \in \mathbb{R}^{N \times N}$  is the symmetric adjacency matrix with  $A_{i,j} = 1$  iff  $e_{ij} \in \mathcal{E}$ , otherwise  $A_{i,j} = 0$ . We use  $D$  to denote the diagonal degree matrix of  $\mathcal{G}$ , *i.e.*,  $D_{i,i} = d_i = \sum_j A_{i,j}$  and use  $\mathcal{N}_i$  to denote the neighborhood set of node  $i$ , *i.e.*,  $\mathcal{N}_i = \{j : e_{ij} \in \mathcal{E}\}$ . A graph signal is a vector  $\mathbf{x} \in \mathbb{R}^N$  defined on  $\mathcal{V}$ , where  $x_i$  is defined on the node  $i$ . We also have a feature matrix  $X \in \mathbb{R}^{N \times F}$ , whose columns are graph signals and whose  $i$ -th row  $X_{i,:}$  is a feature vector of node  $i$ . We use  $Z \in \mathbb{R}^{N \times C}$  to denote the label encoding matrix, whose  $i$ -th row  $Z_{i,:}$  is the one-hot encoding of the label of node  $i$ . The  $i$ -th column of the identity matrix  $I$  is denoted by  $\mathbf{e}_i$ .

### 2.1 Graph Laplacian, Affinity Matrix and Their Variants

The (combinatorial) graph Laplacian is defined as  $L = D - A$ , which is Symmetric Positive Semi-Definite (SPSD) [6]. Its eigendecomposition gives  $L = U\Lambda U^T$ , where the columns  $\mathbf{u}_i$  of  $U \in \mathbb{R}^{N \times N}$  are orthonormal eigenvectors, namely the *graph Fourier basis*,  $\Lambda = \text{diag}(\lambda_1, \dots, \lambda_N)$  with  $\lambda_1 \leq \dots \leq \lambda_N$ , and these eigenvalues are also called *frequencies*. The graph Fourier transform of the graph signal  $\mathbf{x}$  is defined as  $\mathbf{x}_{\mathcal{F}} = U^{-1}\mathbf{x} = U^T\mathbf{x} = [\mathbf{u}_1^T\mathbf{x}, \dots, \mathbf{u}_N^T\mathbf{x}]^T$ , where  $\mathbf{u}_i^T\mathbf{x}$  is the component of  $\mathbf{x}$  in the direction of  $\mathbf{u}_i$ .

In addition to  $L$ , some variants are also commonly used, *e.g.*, the symmetric normalized Laplacian  $L_{\text{sym}} = D^{-1/2}LD^{-1/2} = I - D^{-1/2}AD^{-1/2}$  and the random walk normalized Laplacian  $L_{\text{rw}} = D^{-1}L = I - D^{-1}A$ . The affinity (transition) matrices can be derived from the Laplacians, *e.g.*,  $A_{\text{rw}} = I - L_{\text{rw}} = D^{-1}A$ ,  $A_{\text{sym}} = I - L_{\text{sym}} = D^{-1/2}AD^{-1/2}$  and are considered to be low-pass filters [26]. Their eigenvalues satisfy  $\lambda_i(A_{\text{rw}}) = \lambda_i(A_{\text{sym}}) = 1 - \lambda_i(L_{\text{sym}}) = 1 - \lambda_i(L_{\text{rw}}) \in (-1, 1]$ . Applying the renormalization trick [16] to affinity and Laplacian matrices respectively leads to  $\hat{A}_{\text{sym}} = \tilde{D}^{-1/2}\tilde{A}\tilde{D}^{-1/2}$  and  $\hat{L}_{\text{sym}} = I - \hat{A}_{\text{sym}}$ , where  $\tilde{A} \equiv A + I$  and  $\tilde{D} \equiv D + I$ . The renormalized affinity matrix essentially adds a self-loop to each node in the graph, and is widely used in Graph Convolutional Network (GCN) [16] as follows,

$$Y = \text{softmax}(\hat{A}_{\text{sym}} \text{ReLU}(\hat{A}_{\text{sym}} X W_0) W_1) \quad (1)$$

where  $W_0 \in \mathbb{R}^{F \times F_1}$  and  $W_1 \in \mathbb{R}^{F_1 \times O}$  are learnable parameter matrices. GCN can be trained by minimizing the following cross entropy loss

$$\mathcal{L} = -\text{trace}(Z^T \log Y) \quad (2)$$

where  $\log(\cdot)$  is a component-wise logarithm operation. The random walk renormalized matrix  $\hat{A}_{\text{rw}} = \tilde{D}^{-1}\tilde{A}$ , which shares the same eigenvalues as  $\hat{A}_{\text{sym}}$ , can also be applied in GCN. The

corresponding Laplacian is defined as  $\hat{L}_{rw} = I - \hat{A}_{rw}$ .  $\hat{A}_{rw}$  is essentially a random walk matrix and behaves as a mean aggregator that is applied in spatial-based GNNs [13, 12]. To bridge the spectral and spatial methods, we use  $\hat{A}_{rw}$  in the paper.

## 2.2 Metrics of Homophily

The metrics of homophily are defined by considering different relations between node labels and graph structures defined by adjacency matrix. There are three commonly used homophilies: edge homophily [1, 36], node homophily [29], and class homophily [22]<sup>1</sup> defined as follows:

$$H_{\text{edge}}(\mathcal{G}) = \frac{|\{e_{uv} \mid e_{uv} \in \mathcal{E}, Z_{u,:} = Z_{v,:}\}|}{|\mathcal{E}|}, \quad H_{\text{node}}(\mathcal{G}) = \frac{1}{|\mathcal{V}|} \sum_{v \in \mathcal{V}} \frac{|\{u \mid u \in \mathcal{N}_v, Z_{u,:} = Z_{v,:}\}|}{d_v},$$

$$H_{\text{class}}(\mathcal{G}) = \frac{1}{C-1} \sum_{k=1}^C \left[ h_k - \frac{|\{v \mid Z_{v,k} = 1\}|}{N} \right]_+, \quad h_k = \frac{\sum_{v \in \mathcal{V}} |\{u \mid Z_{v,k} = 1, u \in \mathcal{N}_v, Z_{u,:} = Z_{v,:}\}|}{\sum_{v \in \{v \mid Z_{v,k} = 1\}} d_v} \quad (3)$$

where  $[a]_+ = \max(a, 0)$ ;  $h_k$  is the class-wise homophily metric [22]. They are all in the range of  $[0, 1]$  and a value close to 1 corresponds to strong homophily while a value close to 0 indicates strong heterophily.  $H_{\text{edge}}(\mathcal{G})$  measures the proportion of edges that connect two nodes in the same class;  $H_{\text{node}}(\mathcal{G})$  evaluates the average proportion of edge-label consistency of all nodes;  $H_{\text{class}}(\mathcal{G})$  tries to avoid the sensitivity to imbalanced class, which can cause  $H_{\text{edge}}$  misleadingly large. The above definitions are all based on the graph-label consistency and imply that the inconsistency will cause harmful effect to GNNs. With this in mind, we will show a counter example to illustrate the insufficiency of the above metrics and propose new metrics.

## 3 Analysis of Heterophily

### 3.1 Motivation and Aggregation Homophily

Heterophily is believed to be harmful for message-passing based GNNs [36, 29, 5] because intuitively features of nodes in different classes will be falsely mixed and this will lead nodes indistinguishable [36]. Nevertheless, it is not always the case, *e.g.*, the bipartite graph shown in Figure 1 is highly heterophilous according to the homophily metrics in (3), but after mean aggregation, the nodes in classes 1 and 2 only exchange colors and are still distinguishable. Authors in [5] also point out the insufficiency of  $H_{\text{node}}$  by examples to show that different graph typologies with the same  $H_{\text{node}}$  can carry different label information.

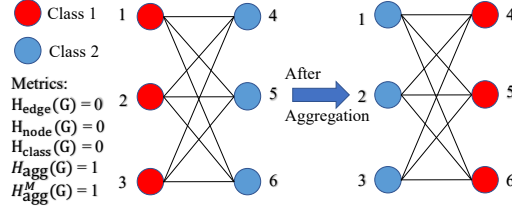

Figure 1: Example of harmless heterophily

To analyze to what extent the graph structure can affect the output of a GNN, we first simplify the GCN by removing its non-linearity as [32]. Let  $\hat{A} \in \mathbb{R}^{N \times N}$  denote a general aggregation operator. Then, equation (1) can be simplified as,

$$Y = \text{softmax}(\hat{A}XW) = \text{softmax}(Y') \quad (4)$$

After each gradient decent step  $\Delta W = \gamma \frac{d\mathcal{L}}{dW}$ , where  $\gamma$  is the learning rate, and the update of  $Y'$  will be (see Appendix B for derivation),

$$\Delta Y' = \hat{A}X\Delta W = \gamma \hat{A}X \frac{d\mathcal{L}}{dW} \propto \hat{A}X \frac{d\mathcal{L}}{dW} = \hat{A}X X^T \hat{A}^T (Z - Y) = S(\hat{A}, X)(Z - Y) \quad (5)$$

where  $S(\hat{A}, X) \equiv \hat{A}X(\hat{A}X)^T$  is a node similarity matrix after aggregation,  $Z - Y$  is the prediction error matrix. The update direction of node  $i$  is essentially a weighted sum of the prediction error, *i.e.*,  $\Delta(Y')_{i,:} = \sum_{j \in \mathcal{V}} [S(\hat{A}, X)]_{i,j} (Z - Y)_{j,:}$ .

<sup>1</sup>The authors in [22] did not name this homophily metric. We name it class homophily based on its definition.

124 To study the effect of heterophily, we define the *aggregation similarity score*.

125 **Definition 1.** *Aggregation similarity score*

$$S_{\text{agg}}(S(\hat{A}, X)) = \frac{\left| \left\{ v \mid \text{Mean}_u(\{S(\hat{A}, X)_{v,u} \mid Z_{u,:} = Z_{v,:}\}) \geq \text{Mean}_u(\{S(\hat{A}, X)_{v,u} \mid Z_{u,:} \neq Z_{v,:}\}) \right\} \right|}{|\mathcal{V}|} \quad (6)$$

126 where  $\text{Mean}_u(\{\cdot\})$  takes the average over  $u$  of a given multiset of values or variables.

127  $S_{\text{agg}}(S(\hat{A}, X))$  is the proportion of nodes  $v \in \mathcal{V}$  that will put relatively larger similarity weights on  
 128 nodes in the same class than in other classes after aggregation. It is easy to see that  $S_{\text{agg}}(S(\hat{A}, X)) \in$   
 129  $[0, 1]$ . But in practice, we observe that in most datasets, we will have  $S_{\text{agg}}(S(\hat{A}, X)) \geq 0.5$ . Based on  
 130 this observation, we rescale (6) to the following modified aggregation similarity for practical usage,

$$\cdot = \left[ 2S_{\text{agg}}(S(\hat{A}, X)) - 1 \right]_+ \quad (7)$$

131 In order to measure the consistency between labels and graph structures without considering node  
 132 features and make a fair comparison with the existing homophily metrics in (3), we define the graph  
 133  $(\mathcal{G})$  aggregation  $(\hat{A})$  homophily and its modified version as

$$H_{\text{agg}}(\mathcal{G}) = S_{\text{agg}}(S(\hat{A}, Z)), \quad H_{\text{agg}}^M(\mathcal{G}) = S_{\text{agg}}^M(S(\hat{A}, Z)) \quad (8)$$

134 In practice, we will only check  $H_{\text{agg}}(\mathcal{G})$  when  $H_{\text{agg}}^M(\mathcal{G}) = 0$ . As Figure 1 shows, when  $\hat{A} = \hat{A}_{\text{rw}}$ ,  
 135  $H_{\text{agg}}(\mathcal{G}) = H_{\text{agg}}^M(\mathcal{G}) = 1$ . Thus, this new metric reflects the fact that nodes in classes 1 and 2 are still  
 136 highly distinguishable after aggregation, while other metrics mentioned before fail to capture the  
 137 information and misleadingly give value 0. This shows the advantage of  $H_{\text{agg}}(\mathcal{G})$  and  $H_{\text{agg}}^M(\mathcal{G})$  by  
 138 additionally considering information from aggregation operator  $\hat{A}$  and the similarity matrix.

139 To comprehensively compare  $H_{\text{agg}}^M(\mathcal{G})$  and the metrics in (3) in terms of how they reveal the influence  
 140 of graph structure on the GNN performance, we generate synthetic graphs and evaluate SGC [32]  
 141 and GCN [16] on them in the next subsection.

### 142 3.2 Evaluation and Comparison on Synthetic Graphs

143 **Data Generation & Experimental Setup** For one dataset, we generate 95 graphs in total with 19  
 144 edge homophily levels varied from 0.05 to 0.95, each corresponding to 5 graphs. For every generated  
 145 graph, we have 5 classes with 400 nodes in each class. In each class, there are randomly generated  
 146 800 intra-class edges and  $[(800 - 800H_{\text{edge}}(\mathcal{G})) / H_{\text{edge}}(\mathcal{G})]^2$  inter-class edges. The features of nodes  
 147 in each class are sampled from node features in the corresponding class of the base dataset. Nodes  
 148 are randomly split into 60%/20%/20% for train/validation/test. We train 1-hop SGC (*sgc-1* [32] and  
 149 GCN [16] on synthetic data (see appendix A.1 for hyperparameter searching range). For each value  
 150 of  $H_{\text{edge}}(\mathcal{G})$ , we take the average test accuracy and standard deviation of runs over 5 generated graphs.  
 151 For each generated graph, we also calculate its  $H_{\text{node}}(\mathcal{G})$ ,  $H_{\text{class}}(\mathcal{G})$  and  $H_{\text{agg}}^M(\mathcal{G})$ . Model performance  
 with respect to different homophily values are shown in Figure 2.

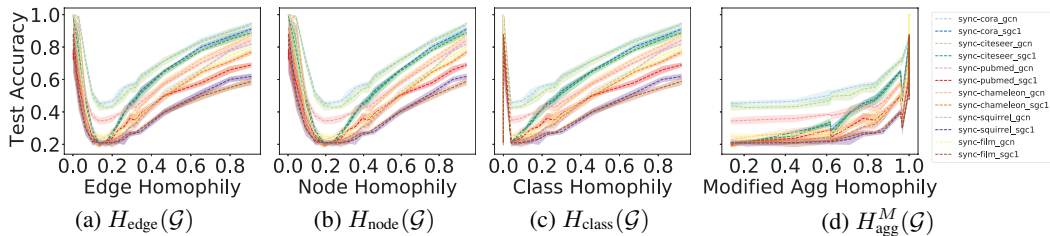

Figure 2: Comparison of baseline performance under different homophily metrics.

152

<sup>2</sup>According to (3),  $H_{\text{edge}}(\mathcal{G}) = \# \text{intra-class edges} / (\# \text{intra-class edges} + \# \text{inter-class edges})$

153 **Comparison of Homophily Metrics** The performance of SGC-1 and GCN are expected to be  
 154 monotonically increasing with a proper and informative homophily metric. However, Figure 2(a)(b)(c)  
 155 show that the performance curves under  $H_{\text{edge}}(\mathcal{G})$ ,  $H_{\text{node}}(\mathcal{G})$  and  $H_{\text{class}}(\mathcal{G})$  are U-shaped<sup>3</sup>, while  
 156 Figure 2(d) reveals a nearly monotonic curve with a little perturbation around 1. This indicates that  
 157  $H_{\text{agg}}^M(\mathcal{G})$  can describe how the graph structure affects the performance of SGC-1 and GCN.

158 In addition, we notice that in Figure 2(a), both SGC-1 and GCN get the worst performance on all  
 159 datasets when  $H_{\text{edge}}(\mathcal{G})$  is around somewhere between 0.1 and 0.2. This interesting phenomenon can  
 160 be explained by the following theorem.

161 **Theorem 1.** (See Appendix C for proof). Suppose there are  $C$  classes in the graph  $\mathcal{G}$ , edges for each  
 162 node are *i.i.d.* generated such that each edge of any node has probability  $h$  of connecting with nodes in  
 163 the same class and probability  $1 - h$  of connecting with nodes in different classes, and  $\mathbb{E}(d_v) = d$  for  
 164 all nodes. Let the aggregation operator  $\hat{A} = \hat{A}_{\text{rw}}$ . Then, for nodes  $v$ ,  $u_1$  and  $u_2$ , where  $Z_{u_1,:} = Z_{v,:}$   
 165 and  $Z_{u_2,:} \neq Z_{v,:}$ , we have

$$g(h) \equiv \mathbb{E} \left( S(\hat{A}, Z)_{v,u_1} \right) - \mathbb{E} \left( S(\hat{A}, Z)_{v,u_2} \right) = \left( \frac{(C-1)(hd+1) - (1-h)d}{(C-1)(d+1)} \right)^2 \quad (9)$$

and the minimum of  $g(h)$  is reached at

$$h = \frac{d+1-C}{Cd} = \frac{d_{\text{intra}}/h + 1 - C}{C(d_{\text{intra}}/h)} \Rightarrow h = \frac{d_{\text{intra}}}{Cd_{\text{intra}} + C - 1}$$

166 where  $d_{\text{intra}} = dh$ , which is the expectation of the number of neighbors of a node that have the same  
 167 label as the node.

168 The value of  $g(h)$  in (9) is the expected differences of the similarity values between nodes in the  
 169 same class as  $v$  and nodes in other classes.  $g(h)$  is strongly related to the definition of aggregation  
 170 homophily and its minimum potentially implies the worst value of  $H_{\text{agg}}(\mathcal{G})$ . In the synthetic experi-  
 171 ments, we have  $d_{\text{intra}} = 2$ ,  $C = 5$  and the minimum of  $g(h)$  is reached at  $h = 1/7 \approx 0.14$ , which  
 172 corresponds to the lowest point in the performance curve in Figure 2(a). In other words, the  $h$  where  
 173 SGC-1 and GCN perform worst is where  $g(h)$  gets the smallest value, instead of the point with the  
 174 smallest edge homophily value. This again shows the advantage of  $H_{\text{agg}}(\mathcal{G})$  over  $H_{\text{edge}}(\mathcal{G})$  by taking  
 175 use of the similarity matrix.

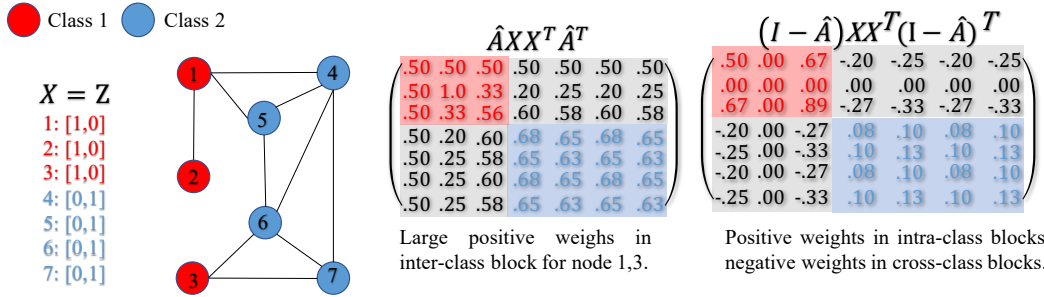

Figure 3: Example of how HP filter addresses harmful heterophily

## 176 4 Adaptive Channel Mixing (ACM) Framework

### 177 4.1 How Diversification Operation Helps with Harmful Heterophily

178 We first consider the example shown in Figure 3. From  $S(\hat{A}, X)$ , nodes 1,3 assign relatively large  
 179 positive weights to nodes in class 2, which will negatively affect information aggregation. Despite  
 180 the fact, we can still distinguish between nodes 1,3 and 4,5,6,7 by considering their neighborhood

<sup>3</sup>A similar J-shaped curve is found in [36], though using different data generation processes. It does not mention the insufficiency of edge homophily.

181 difference: nodes 1,3 are distinguishable from their neighbors while nodes 4,5,6,7 are homogeneous to  
 182 their neighbors. This indicates, in some cases, although some nodes become similar after aggregation,  
 183 they are still distinguishable via surrounding dissimilarities. This suggests the possibility of using  
 184 *diversification operation to address harmful heterophily i.e.,* high-pass (HP) filter  $I - \hat{A}$  [8] (will be  
 185 introduced in next subsection). As  $S(I - \hat{A}, Z)$  in Figure 3 shows, nodes 1,3 assign negative weights  
 186 to nodes 4,5,6,7, i.e., nodes 1,3 treat nodes 4,5,6,7 as negative samples and will move away from  
 187 them. Base on this example, we propose diversification distinguishability as follows,

188 **Definition 2.** *Diversification Distinguishability (DD) based on  $S(I - \hat{A}, X)$ .*

189 *Given  $S(I - \hat{A}, X)$ , a node  $v$  is diversification distinguishable if the following two conditions are*  
 190 *satisfied at the same time,*

$$\begin{aligned} 1. & \text{Mean}_u \left( \{S(I - \hat{A}, X)_{v,u} | u \in \mathcal{V} \wedge Z_{u,:} = Z_{v,:}\} \right) \geq 0; \\ 2. & \text{Mean}_u \left( \{S(I - \hat{A}, X)_{v,u} | u \in \mathcal{V} \wedge Z_{u,:} \neq Z_{v,:}\} \right) \leq 0 \end{aligned} \quad (10)$$

191 *Then, graph diversification distinguishability value is defined as*

$$\text{DD}_{\hat{A},X}(\mathcal{G}) = \frac{1}{|\mathcal{V}|} \left| \{v | v \text{ is diversification distinguishable}\} \right| \quad (11)$$

192  $\text{DD}_{\hat{A},X}(\mathcal{G}) \in [0, 1]$  measures the proportion of nodes that HP filter is helpful for. Its effectiveness  
 193 can be proved for binary classification problems under certain conditions, leading us to:

194 **Theorem 2.** (See Appendix D for proof). Suppose  $X = Z$ ,  $\hat{A} = \hat{A}_{\text{rw}}$ . Then, for a binary classifica-  
 195 tion problem, i.e.,  $C = 2$ , all nodes are diversification distinguishable and  $\text{DD}_{\hat{A},Z}(\mathcal{G}) = 1$ .

196 Conducting both aggregation and diversification operations to distinctively extract the low- and high-  
 197 frequency information from graph signals is the same as using filterbanks in graph signal processing.  
 198 We introduce filterbanks in next subsection.

## 199 4.2 Filterbank in Spectral and Spatial Forms

200 **Filterbank** For the graph signal  $\mathbf{x}$  defined on  $\mathcal{G}$ , a 2-channel linear (analysis) filterbank [8] <sup>4</sup>  
 201 includes a pair of filters  $H_{\text{LP}}, H_{\text{HP}}$ , where  $H_{\text{LP}}$  and  $H_{\text{HP}}$  retain the low-frequency and high-frequency  
 202 content of  $\mathbf{x}$ , respectively.

203 Most existing GNNs are under uni-channel filtering architecture [16, 31, 13] with either  $H_{\text{LP}}$  or  
 204  $H_{\text{HP}}$  channel that only partially preserves the input information. Unlike the uni-channel architecture,  
 205 filterbanks with  $H_{\text{LP}} + H_{\text{HP}} = I$  will not lose any information of the input signal, i.e., perfect  
 206 reconstruction property [8, 28].

207 Generally, the Laplacian matrices  $(L_{\text{sym}}, L_{\text{rw}}, \hat{L}_{\text{sym}}, \hat{L}_{\text{rw}})$  can be regarded as HP filters [8] and affinity  
 208 matrices  $(A_{\text{sym}}, A_{\text{rw}}, \hat{A}_{\text{sym}}, \hat{A}_{\text{rw}})$  can be treated as LP filters [26, 12]. Moreover, MLPs can be  
 209 considered as owing a special identity filterbank with matrix  $I$  that satisfies  $H_{\text{LP}} + H_{\text{HP}} = I + 0 = I$ .

210 **Filterbank in Spatial Form** Filterbank methods can also be extended to spatial GNNs. Formally,  
 211 on the node level, left multiplying  $H_{\text{LP}}$  and  $H_{\text{HP}}$  on  $\mathbf{x}$  performs as aggregation and diversification  
 212 operations, respectively. For example, suppose  $H_{\text{LP}} = \hat{A}$  and  $H_{\text{HP}} = I - \hat{A}$ , then for node  $i$  we have

$$(H_{\text{LP}}\mathbf{x})_i = \sum_{j \in \{\mathcal{N}_i \cup i\}} \hat{A}_{i,j} \mathbf{x}_j, (H_{\text{HP}}\mathbf{x})_i = \mathbf{x}_i - \sum_{j \in \{\mathcal{N}_i \cup i\}} \hat{A}_{i,j} \mathbf{x}_j \quad (12)$$

213 where  $\hat{A}_{i,j}$  is the connection weight between two nodes. To leverage HP and identity channels in  
 214 GNNs, we propose the Adaptive Channel Mixing (ACM) architecture in the following subsection.

<sup>4</sup>In graph signal processing, an additional synthesis filter [8] is required to form the 2-channel filterbank. But synthesis filter is not needed in our framework, so we do not introduce it in our paper.

### 4.3 Adaptive Channel Mixing(ACM) GNN Framework

ACM framework can be applied in lots of baseline GNNs and in this subsection, we use GCN as an example and introduce ACM framework in matrix form. We use  $H_{LP}$  and  $H_{HP}$  to represent general LP and HP filters. The ACM framework includes 3 steps as follows,

#### Step 1. Feature Extraction for Each Channel:

$$H_L^l = H_{LP} \text{ReLU} (H^{l-1} W_L^{l-1}), H_H^l = H_{HP} \text{ReLU} (H^{l-1} W_H^{l-1}), H_I^l = I \text{ReLU} (H^{l-1} W_I^{l-1}), \\ W_L^{l-1}, W_H^{l-1}, W_I^{l-1} \in \mathbb{R}^{F_{l-1} \times F_l};$$

#### Step 2. Feature-based Weight Learning with Row Normalization (RN):

$$\tilde{H}_I^l = \text{RN} (H_I^l), \tilde{H}_L^l = \text{RN} (H_L^l), \tilde{H}_H^l = \text{RN} (H_H^l); \\ \alpha_L^l = \sigma \left( \text{ELU} \left( \tilde{H}_L^l \tilde{W}_L^l \right) \right), \alpha_H^l = \sigma \left( \text{ELU} \left( \tilde{H}_H^l \tilde{W}_H^l \right) \right), \alpha_I^l = \sigma \left( \text{ELU} \left( \tilde{H}_I^l \tilde{W}_I^l \right) \right), \\ \tilde{W}_L^{l-1}, \tilde{W}_H^{l-1}, \tilde{W}_I^{l-1} \in \mathbb{R}^{F_l \times 1};$$

#### Step 3. Channel Mixing:

$$H^l = (\text{diag}(\alpha_L^l) H_L^l + \text{diag}(\alpha_H^l) H_H^l + \text{diag}(\alpha_I^l) H_I^l). \quad (13)$$

ACM-GCN first implements distinct non-linear feature extractions for 3 channels, respectively. After processed by a set of filterbanks, 3 filtered components  $H_L^l, H_H^l, H_I^l$  are obtained. Different nodes may have different needs for the information in the 3 channels, *e.g.*, in Figure 3, nodes 1,3 demand high-frequency information while node 2 only needs low-frequency information. To adaptively exploit information from different channels, ACM-GCN learns rowwise (nodewise) feature-conditioned (un-normalized) weights to combine the 3 channels. ACM can be easily plugged into spatial GNNs by replacing  $H_{LP}$  and  $H_{HP}$  by aggregation and diversification operations as shown in (12). See Appendix E for a detailed discussion of model comparison on synthetic datasets.

**Complexity** Number of learnable parameters in layer  $l$  of ACM-GCN is  $3F_{l-1}(F_l + 1)$ , while it is  $F_{l-1}F_l$  in GCN. The computation of step 1-3 takes  $NF_l(20 + F_{l-1}) + 2F_l(\text{nnz}(H_{LP}) + \text{nnz}(H_{HP}))$  flops, while GCN layer takes  $2NF_{l-1}F_l + 2F_l(\text{nnz}(H_{LP}))$  flops, where  $\text{nnz}(\cdot)$  is the number of non-zero elements. A detailed experiments on running time is conducted in section 6.1.

**Limitations** Diversification operation does not work well in all harmful heterophily cases. For example, consider an imbalanced dataset where several small clusters with distinctive labels are densely connected to a large cluster. In this case, the surrounding differences of nodes in small clusters are similar, *i.e.*, the neighborhood differences are mainly from their connection to the same large cluster, and this possibly makes diversification operation fail to discriminate them. See a more detailed demonstration and discussion in Appendix F.

## 5 Prior Work

**GNNs on Addressing Heterophily** We discuss relevant work of GNNs on addressing heterophily challenge in this part. [1] acknowledges the difficulty of learning on graphs with weak homophily and propose MixHop to extract features from multi-hop neighborhood to get more information. Geom-GCN [29] precomputes unsupervised node embeddings and uses graph structure defined by geometric relationships in the embedding space to define the bi-level aggregation process. [14] proposes measurements based on feature smoothness and label smoothness that are potentially helpful to guide GNNs on dealing with heterophilous graphs. H<sub>2</sub>GCN [36] combines 3 key designs to address heterophily: (1) ego- and neighbor-embedding separation; (2) higher-order neighborhoods; (3) combination of intermediate representations. CPGNN [35] models label correlations by the compatibility matrix, which is beneficial for heterophily settings, and propagates a prior belief estimation into GNNs by the compatibility matrix. GPRGNN [5] uses learnable weights that can be both positive and negative for feature propagation, it allows GRPGNN to adapt heterophily structure of graph and is able to handle both high and low frequency parts of the graph signals.

**GNNs with Filterbanks** Previously, there are geometric scattering networks [10, 28] that apply filterbanks to address over-smoothing [21] problem. The scattering construction captures different channels of variation from node features or labels. In geometric learning and graph signal processing, the band-pass filtering operations extract geometric information beyond smooth signals, thus it is believed that filterbanks can alleviate over-smoothing in GNNs. In ACM framework, we aim to

design a framework with the help of filterbanks to adaptively utilize different channels to address the challenge of learning on heterophilous graph. We deal with different problem as in [10, 28].

## 6 Experiments on Real-World Datasets

In this section, we evaluate ACM framework on real-world datasets. We first conduct ablation studies in subsection 6.1 to validate different components. Then, we compare with the state-of-the-arts models in subsection 6.2.

### 6.1 Ablation Study & Efficiency

| Ablation Study on Different Components in ACM-SGC and ACM-GCN (%)    |                       |                                    |                                   |                                    |                                    |                                    |                                    |                                    |                                    |                                    |
|----------------------------------------------------------------------|-----------------------|------------------------------------|-----------------------------------|------------------------------------|------------------------------------|------------------------------------|------------------------------------|------------------------------------|------------------------------------|------------------------------------|
| Baseline                                                             | Model Components      | Cornell                            | Wisconsin                         | Texas                              | Film                               | Chameleon                          | Squirrel                           | Cora                               | CiteSeer                           | PubMed                             |
| Models                                                               | LP HP Identity Mixing | Acc $\pm$ Std                      | Acc $\pm$ Std                     | Acc $\pm$ Std                      | Acc $\pm$ Std                      | Acc $\pm$ Std                      | Acc $\pm$ Std                      | Acc $\pm$ Std                      | Acc $\pm$ Std                      | Acc $\pm$ Std                      |
| SGC-1 w/                                                             | ✓                     | 74.43 $\pm$ 6.01                   | 69.75 $\pm$ 5.02                  | 84.1 $\pm$ 2.32                    | 25.34 $\pm$ 2.41                   | 64.55 $\pm$ 1.38                   | 42.8 $\pm$ 1.1                     | 85.24 $\pm$ 1.85                   | 79.85 $\pm$ 1.04                   | 84.44 $\pm$ 0.38                   |
|                                                                      | ✓ ✓                   | 84.92 $\pm$ 4.59                   | 91.75 $\pm$ 4.05                  | 89.34 $\pm$ 3.67                   | 36.94 $\pm$ 1.07                   | 63.11 $\pm$ 1.64                   | 44.8 $\pm$ 1.35                    | 85.6 $\pm$ 1.33                    | 80.33 $\pm$ 1.25                   | 84.5 $\pm$ 0.42                    |
|                                                                      | ✓ ✓ ✓                 | 92.3 $\pm$ 3.8                     | 93 $\pm$ 2.11                     | 91.64 $\pm$ 3.65                   | 38.25 $\pm$ 1.6                    | 57 $\pm$ 1.93                      | 40.2 $\pm$ 2.18                    | 85.98 $\pm$ 0.84                   | 80.2 $\pm$ 2.01                    | 84.37 $\pm$ 0.44                   |
|                                                                      | ✓ ✓ ✓ ✓               | 88.2 $\pm$ 3.88                    | 90.75 $\pm$ 2.37                  | 92.3 $\pm$ 3.88                    | 36.58 $\pm$ 1.36                   | 61.64 $\pm$ 2.52                   | 41.59 $\pm$ 2.29                   | 84.98 $\pm$ 1.2                    | 79.81 $\pm$ 1.2                    | 87.13 $\pm$ 0.58                   |
| GCN w/                                                               | ✓                     | 81.31 $\pm$ 3.13                   | 70.25 $\pm$ 4.7                   | 82.13 $\pm$ 4.05                   | 34.45 $\pm$ 0.83                   | 64.86 $\pm$ 1.56                   | 45.11 $\pm$ 1.39                   | 87.47 $\pm$ 0.82                   | 81.3 $\pm$ 0.95                    | 87.85 $\pm$ 0.44                   |
|                                                                      | ✓ ✓                   | 82.95 $\pm$ 5.17                   | 88.63 $\pm$ 2.51                  | 88.03 $\pm$ 2.67                   | 40.16 $\pm$ 1.06                   | <b>68.12 <math>\pm</math> 1.73</b> | 52.08 $\pm$ 1.47                   | 88.44 $\pm$ 1.62                   | 81.45 $\pm$ 0.9                    | 90.09 $\pm$ 0.29                   |
|                                                                      | ✓ ✓ ✓                 | 92.13 $\pm$ 2.65                   | 94.37 $\pm$ 3.27                  | 93.11 $\pm$ 2.48                   | 40.3 $\pm$ 1.63                    | 66.67 $\pm$ 2.16                   | 49.45 $\pm$ 0.83                   | 88.46 $\pm$ 1.31                   | 81.42 $\pm$ 1.13                   | <b>91.21 <math>\pm</math> 1.17</b> |
|                                                                      | ✓ ✓ ✓ ✓               | 88.52 $\pm$ 4.51                   | 95 $\pm$ 2.25                     | 92.3 $\pm$ 2.21                    | 40.25 $\pm$ 1.78                   | 65.97 $\pm$ 2.24                   | 51.02 $\pm$ 1.64                   | 88.7 $\pm$ 1.68                    | 80.93 $\pm$ 1.53                   | 90.66 $\pm$ 0.32                   |
|                                                                      |                       | <b>92.62 <math>\pm</math> 3.04</b> | <b>95.37 <math>\pm</math> 2.1</b> | <b>94.75 <math>\pm</math> 1.77</b> | <b>41.48 <math>\pm</math> 0.78</b> | 67.79 $\pm$ 1.79                   | <b>52.86 <math>\pm</math> 1.96</b> | <b>89.11 <math>\pm</math> 0.87</b> | <b>82.16 <math>\pm</math> 0.84</b> | 90.72 $\pm$ 0.7                    |
| Average Running Time Per Epoch/Average Total Running Time Comparison |                       |                                    |                                   |                                    |                                    |                                    |                                    |                                    |                                    |                                    |
| SGC-1 w/                                                             | ✓                     | 2.70ms/0.59s                       | 2.53ms/0.51s                      | 2.63ms/0.55s                       | 3.62ms/1.13s                       | 4.96ms/3.99s                       | 4.09ms/0.87s                       | 5.34ms/8.22s                       | 4.79ms/4.55s                       | 5.58ms/7.70s                       |
|                                                                      | ✓ ✓                   | 4.93ms/1.04s                       | 5.03ms/1.04s                      | 6.67ms/1.58s                       | 6.68ms/1.37s                       | 6.42ms/1.96s                       | 7.41ms/1.93s                       | 6.68ms/2.43s                       | 6.69ms/1.96s                       | 7.20ms/2.48s                       |
|                                                                      | ✓ ✓ ✓                 | 4.73ms/0.98s                       | 4.99ms/1.09s                      | 4.79ms/1.02s                       | 5.53ms/1.28s                       | 5.89ms/1.50s                       | 6.48ms/1.50s                       | 6.50ms/2.09s                       | 6.23ms/1.76s                       | 6.73ms/2.24s                       |
|                                                                      | ✓ ✓ ✓ ✓               | 4.30ms/0.88s                       | 4.51ms/0.91s                      | 4.58ms/0.95s                       | 5.86ms/1.19s                       | 5.99ms/1.43s                       | 6.84ms/1.63s                       | 5.44ms/1.37s                       | 5.72ms/1.44s                       | 6.36ms/2.04s                       |
| GCN w/                                                               | ✓                     | 5.15ms/1.08s                       | 5.82ms/1.28s                      | 5.55ms/1.18s                       | 6.28ms/1.50s                       | 6.60ms/1.96s                       | 7.27ms/1.52s                       | 7.05ms/2.40s                       | 6.99ms/1.94s                       | 7.28ms/2.07s                       |
|                                                                      | ✓ ✓                   | 3.78ms/0.78s                       | 3.91ms/0.79s                      | 3.80ms/0.78s                       | 4.42ms/0.89s                       | 4.44ms/0.89s                       | 6.85ms/1.48s                       | 4.19ms/0.87s                       | 5.22ms/1.13s                       | 4.81ms/0.99s                       |
|                                                                      | ✓ ✓ ✓                 | 7.63ms/1.54s                       | 7.99ms/1.92s                      | 7.26ms/1.48s                       | 8.42ms/1.73s                       | 9.74ms/2.76s                       | 11.19ms/2.38s                      | 7.74ms/1.61s                       | 9.98ms/3.56s                       | 9.10ms/1.85s                       |
|                                                                      | ✓ ✓ ✓ ✓               | 6.75ms/1.36s                       | 6.83ms/1.41s                      | 6.99ms/1.46s                       | 7.62ms/1.54s                       | 7.80ms/1.67s                       | 9.76ms/2.02s                       | 7.59ms/1.54s                       | 7.43ms/1.54s                       | 8.28ms/1.70s                       |
|                                                                      |                       | 7.33ms/1.49s                       | 6.80ms/1.38s                      | 6.99ms/1.41s                       | 8.76ms/2.19s                       | 7.81ms/1.59s                       | 11.26ms/2.29s                      | 7.77ms/1.59s                       | 7.66ms/1.56s                       | 8.36ms/1.70s                       |
|                                                                      |                       | 8.04ms/1.63s                       | 8.98ms/1.83s                      | 8.17ms/1.65s                       | 9.29ms/2.00s                       | 9.33ms/1.96s                       | 12.15ms/2.53s                      | 9.16ms/1.85s                       | 9.48ms/1.95s                       | 9.54ms/1.92s                       |

Table 1: Ablation study on 9 real-world datasets [29]. Cell with ✓ means the component is applied to the baseline model. The best test results are highlighted.

We investigate the effectiveness and efficiency of adding HP, identity channels and the adaptive mixing mechanism in ACM framework by ablation study. Specifically, we apply the above components to SGC-1 and GCN separately, run 10 times on each dataset used in [29] with 60%/20%/20% random splits for train/validation/test and report the average test accuracy as well as the standard deviation. We also record the average running time per epoch(in milliseconds)/average total running time(in seconds) to compare the efficiency. (See Appendix A for hyperparameter searching space.)

From the results we can see that on most datasets, the additional HP and identity channels are helpful, even on strong homophily datasets, such as Cora, CiteSeer and PubMed. The adaptive mixing mechanism also shows its advantage over the method that directly adds the three channels together. This illustrates the necessity of learning to customize the channel usage adaptively for different nodes. As for efficiency, we can see that the running time is approximately doubled in ACM framework than the original model.

### 6.2 Comparison with State-of-the-art Models

**Datasets & Experimental Setup** In this section, we implement SGC [32] with 1 hop and 2 hop (SGC-1, SGC-2), GCN [16] and GraphSAGE and apply them [13] in ACM framework: we use  $\hat{A}_{rw}$  and mean aggregator as LP filter and the corresponding HP filter can be derived from (12). We compare them with several baselines and state-of-the-art models: MLP with 2 layers (MLP-2), GAT [31], APPNP [17], GPRGNN [5], H<sub>2</sub>GCN [36], MixHop [1], GCN+JK [16, 33, 22], GAT+JK [31, 33, 22] and Geom-GCN [29]. Besides the 9 benchmark datasets used in [29], we further tests the above models on 2 new benchmark datasets, *Deezer-Europe* and *YelpChi*, that are proposed in



|                                                                                      | Cornell             | Wisconsin          | Texas              | Film                | Chameleon           | Squirrel            | Deezer-Europe       | YelpChi             | Cora                | CiteSeer            | PubMed             |             |
|--------------------------------------------------------------------------------------|---------------------|--------------------|--------------------|---------------------|---------------------|---------------------|---------------------|---------------------|---------------------|---------------------|--------------------|-------------|
| #nodes                                                                               | 183                 | 251                | 183                | 7,600               | 2,277               | 5,201               | 28,281              | 45,954              | 2,708               | 3,327               | 19,717             |             |
| #edges                                                                               | 295                 | 499                | 309                | 33,544              | 36,101              | 217,073             | 92,752              | 3,846,979           | 5,429               | 4,732               | 44,338             |             |
| #features                                                                            | 1,703               | 1,703              | 1,703              | 931                 | 2,325               | 2,089               | 31,241              | 32                  | 1,433               | 3,703               | 500                |             |
| #classes                                                                             | 5                   | 5                  | 5                  | 5                   | 5                   | 5                   | 2                   | 2                   | 7                   | 6                   | 3                  |             |
| $H_{edge}(\mathcal{G})$                                                              | 0.5669              | 0.4480             | 0.4106             | 0.3750              | 0.2795              | 0.2416              | 0.5251              | 0.7730              | 0.8100              | 0.7362              | 0.8024             |             |
| $H_{node}(\mathcal{G})$                                                              | 0.3855              | 0.1498             | 0.0968             | 0.2210              | 0.2470              | 0.2156              | 0.5299              | 0.7698              | 0.8252              | 0.7175              | 0.7924             |             |
| $H_{class}(\mathcal{G})$                                                             | 0.0468              | 0.0941             | 0.0013             | 0.0110              | 0.0620              | 0.0254              | 0.0304              | 0.0520              | 0.7657              | 0.6270              | 0.6641             |             |
| $H_{agg}^M(\mathcal{G})$                                                             | 0.8032              | 0.7768             | 0.694              | 0.6822              | 0.61                | 0.3566              | 0.5790              | 0.7206              | 0.9904              | 0.9826              | 0.9432             |             |
| Data Splits(%)                                                                       | 60/20/20            | 60/20/20           | 60/20/20           | 60/20/20            | 60/20/20            | 60/20/20            | 50/25/25            | 50/25/25            | 60/20/20            | 60/20/20            | 60/20/20           |             |
| Test Accuracy (%) of State-of-the-art Models, Baseline GNN Models and ACM-GNN models |                     |                    |                    |                     |                     |                     |                     |                     |                     |                     |                    | Rank        |
| MLP-2*                                                                               | 91.30 ± 0.70        | 93.87 ± 3.33       | 92.26 ± 0.71       | 38.58 ± 0.25        | 46.72 ± 0.46        | 31.28 ± 0.27        | 66.55 ± 0.72        | 87.94 ± 0.52        | 76.44 ± 0.30        | 76.25 ± 0.28        | 86.43 ± 0.13       | 9.00        |
| GAT*                                                                                 | 76.00 ± 1.01        | 71.01 ± 4.66       | 78.87 ± 0.86       | 35.98 ± 0.23        | 63.9 ± 0.46         | 42.72 ± 0.33        | 61.09 ± 0.77        | 81.42 ± 2.12        | 76.70 ± 0.42        | 67.20 ± 0.46        | 83.28 ± 0.12       | 11.73       |
| APPNP*                                                                               | 91.80 ± 0.63        | 92.00 ± 3.59       | 91.18 ± 0.70       | 38.86 ± 0.24        | 51.91 ± 0.56        | 34.77 ± 0.34        | 67.21 ± 0.56        | 75.60 ± 0.48        | 79.41 ± 0.38        | 68.59 ± 0.30        | 85.02 ± 0.09       | 9.09        |
| GPRGNN*                                                                              | 91.36 ± 0.70        | 93.75 ± 2.37       | 92.92 ± 0.61       | 39.30 ± 0.27        | 67.48 ± 0.40        | 49.93 ± 0.53        | 66.90 ± 0.50        | 71.59 ± 0.38        | 79.51 ± 0.36        | 67.63 ± 0.38        | 85.07 ± 0.09       | 6.64        |
| H <sub>2</sub> GCN                                                                   | 86.23 ± 4.71        | 87.5 ± 1.77        | 85.90 ± 3.53       | 38.85 ± 1.17        | 52.30 ± 0.48        | 30.39 ± 1.22        | <b>67.22 ± 0.90</b> | 88.48 ± 0.21        | 87.52 ± 0.61        | 79.97 ± 0.69        | 87.78 ± 0.28       | 7.27        |
| MixHop                                                                               | 60.33 ± 28.53       | 77.25 ± 7.80       | 76.39 ± 7.66       | 33.13 ± 2.40        | 36.28 ± 10.22       | 24.55 ± 2.60        | 66.80 ± 0.58        | 87.02 ± 0.50        | 65.65 ± 11.31       | 49.52 ± 13.35       | 87.04 ± 4.10       | 13.09       |
| GCN+JK                                                                               | 66.56 ± 13.82       | 62.50 ± 15.75      | 80.66 ± 1.91       | 32.72 ± 2.62        | 64.68 ± 2.85        | <b>53.40 ± 1.90</b> | 60.99 ± 0.14        | 64.35 ± 0.86        | 86.90 ± 1.51        | 73.77 ± 1.85        | 90.09 ± 0.68       | 10.09       |
| GAT+JK                                                                               | 74.43 ± 10.24       | 69.50 ± 3.12       | 75.41 ± 7.18       | 35.41 ± 0.97        | <b>68.14 ± 1.18</b> | 52.28 ± 3.61        | 59.66 ± 0.92        | <b>90.04 ± 0.61</b> | <b>89.52 ± 0.43</b> | 74.49 ± 2.76        | 89.15 ± 0.87       | 8.27        |
| Geom-GCN†                                                                            | 60.81               | 64.12              | 67.57              | 31.63               | 60.9                | 38.14               | NA                  | NA                  | 85.27               | 77.99               | 90.05              | 12.33       |
| SGC-1                                                                                | 74.43 ± 6.01        | 69.75 ± 5.02       | 84.1 ± 2.42        | 25.34 ± 3.41        | 62.34 ± 1.92        | 42.8 ± 1.1          | 59.73 ± 0.12        | 58.62 ± 0.85        | 85.16 ± 0.82        | 79.93 ± 1.03        | 80.97 ± 0.91       | 12.18       |
| SGC-2                                                                                | 77.7 ± 4.47         | 72.75 ± 3.91       | 81.48 ± 3.88       | 29.39 ± 0.20        | 63.02 ± 0.43        | 37.41 ± 1           | 61.56 ± 0.51        | 57.18 ± 0.75        | 86.58 ± 0.26        | 76.23 ± 0.29        | 81.14 ± 0.71       | 11.73       |
| GCN                                                                                  | 81.31 ± 3.13        | 70.25 ± 4.7        | 82.13 ± 4.05       | 34.45 ± 0.83        | 64.86 ± 1.56        | 45.11 ± 1.39        | 62.23 ± 0.53        | 63.62 ± 1.00        | 87.47 ± 0.82        | 81.3 ± 0.95         | 87.85 ± 0.44       | 8.18        |
| GraphSAGE                                                                            | 71.41 ± 1.24        | 64.85 ± 5.14       | 79.03 ± 1.20       | 36.37 ± 0.21        | 62.15 ± 0.42        | 41.26 ± 0.26        | 62.55 ± 0.48        | 62.57 ± 1.12        | 86.58 ± 0.26        | 78.24 ± 0.30        | 86.85 ± 0.11       | 11.00       |
| ACM-SGC-1                                                                            | 91.31 ± 2.94        | 93.38 ± 2.68       | 91.97 ± 3.23       | 38.71 ± 1.22        | 62.39 ± 2.45        | 45.65 ± 1.44        | 66.42 ± 0.96        | 85.83 ± 1.34        | 86.52 ± 1.55        | 80.79 ± 1.65        | 87.69 ± 0.6        | 6.27        |
| ACM-SGC-2                                                                            | 90.66 ± 3.36        | 92.13 ± 5.06       | 90.66 ± 2.84       | 38.77 ± 1.74        | 58.51 ± 2.42        | 39.37 ± 1.41        | 66.98 ± 0.88        | 85.84 ± 1.17        | 87.44 ± 0.8         | 80.03 ± 1.26        | 88.01 ± 0.93       | 6.73        |
| ACM-GCN                                                                              | <b>92.62 ± 3.04</b> | <b>95.37 ± 2.1</b> | <b>95.08 ± 1.8</b> | <b>41.48 ± 0.78</b> | 67.79 ± 1.79        | 52.86 ± 1.96        | 66.85 ± 0.95        | 89.91 ± 1.02        | 89.11 ± 0.87        | <b>82.16 ± 0.84</b> | <b>90.72 ± 0.7</b> | <b>1.73</b> |
| ACM-SAGE                                                                             | 91.31 ± 2.94        | 90.13 ± 2.67       | 91.97 ± 3.15       | 36.68 ± 2.46        | 61.84 ± 2.71        | 44.63 ± 3.02        | 66.21 ± 0.89        | 88.73 ± 1.45        | 86.24 ± 1.25        | 80.87 ± 1.36        | 88.51 ± 0.9        | 6.45        |

Table 2: Experimental results: average test accuracy  $\pm$  standard deviation on 11 real-world benchmark datasets. The best results are highlighted. The "†" results are from [29] and NA means the reported results are not available. Results "\*" are from [5, 22].

[22]<sup>5</sup>. We test these models 10 times on *Cornell*, *Wisconsin*, *Texas*, *Film*, *Chameleon*, *Squirrel*, *Cora*, *CiteSeer* and *PubMed* following the same early stopping strategy, the same data splitting and Adam [15] optimizer used in GPRGNN [5]. For *Deezer-Europe* and *YelpChi*, we test the above models 5 times with the same early stopping strategy, the same splits and AdamW [24] used in [22]. The details of hyperparameter search are reported in appendix A.

The main results of this set of experiments with statistics of datasets are summarized in Table 2, where we report the mean accuracy and standard deviation. We can see that after applied in ACM framework, the performance of baseline models are boosted on almost all tasks. Especially, ACM-GCN performs the best in terms of average rank (1.73) across all datasets and achieves SOTA performance on 6 out of 11 datasets. Overall, It suggests that ACM framework can help GNNs to generalize better on node classification tasks on heterophilous graphs.

## 7 Future Work

The similarity matrix and the new metrics defined in this paper mainly capture the linear relations of the aggregated nodes. But this might be insufficient sometimes when nonlinearity information in feature vectors are important for classification. In the future, similarity matrix that is able to capture nonlinear relations between nodes can be proposed to define new homophily metrics.

From experimental results, the standard deviation of ACM-GNNs are relatively higher than GNNs on some tasks and this is suspiciously caused by the feature-based weight learning mechanism. In the future, a stabilizer or a more robust weight learning method can be proposed to reduce the variance.

## 8 Social Impact

We do not find any direct path of this work to any negative social impact.

<sup>5</sup>The authors proposed 8 new datasets. From the reported results, GCN only underperform MLP-2 on *Deezer-Europe* and *YelpChi*, which demonstrates the heterophily of these 2 datasets, therefore we choose them.

## References

- [1] S. Abu-El-Haija, B. Perozzi, A. Kapoor, N. Alipourfard, K. Lerman, H. Harutyunyan, G. Ver Steeg, and A. Galstyan. Mixhop: Higher-order graph convolutional architectures via sparsified neighborhood mixing. In *international conference on machine learning*, pages 21–29. PMLR, 2019.
- [2] D. Bahdanau, K. Cho, and Y. Bengio. Neural machine translation by jointly learning to align and translate. *arXiv preprint arXiv:1409.0473*, 2014.
- [3] P. W. Battaglia, J. B. Hamrick, V. Bapst, A. Sanchez-Gonzalez, V. Zambaldi, M. Malinowski, A. Tacchetti, D. Raposo, A. Santoro, R. Faulkner, et al. Relational inductive biases, deep learning, and graph networks. *arXiv preprint arXiv:1806.01261*, 2018.
- [4] M. M. Bronstein, J. Bruna, Y. LeCun, A. Szlam, and P. Vandergheynst. Geometric deep learning: going beyond euclidean data. *arXiv*, abs/1611.08097, 2016.
- [5] E. Chien, J. Peng, P. Li, and O. Milenkovic. Adaptive universal generalized pagerank graph neural network. In *International Conference on Learning Representations*. <https://openreview.net/forum>, 2021.
- [6] F. R. Chung and F. C. Graham. *Spectral graph theory*. Number 92. American Mathematical Soc., 1997.
- [7] M. Defferrard, X. Bresson, and P. Vandergheynst. Convolutional neural networks on graphs with fast localized spectral filtering. *arXiv*, abs/1606.09375, 2016.
- [8] V. N. Ekambaram. *Graph structured data viewed through a fourier lens*. University of California, Berkeley, 2014.
- [9] M. Fey and J. E. Lenssen. Fast graph representation learning with pytorch geometric. *arXiv preprint arXiv:1903.02428*, 2019.
- [10] F. Gao, G. Wolf, and M. Hirn. Geometric scattering for graph data analysis. In *International Conference on Machine Learning*, pages 2122–2131. PMLR, 2019.
- [11] A. Graves, A.-r. Mohamed, and G. Hinton. Speech recognition with deep recurrent neural networks. In *2013 IEEE international conference on acoustics, speech and signal processing*, pages 6645–6649. Ieee, 2013.
- [12] W. L. Hamilton. Graph representation learning. *Synthesis Lectures on Artificial Intelligence and Machine Learning*, 14(3):1–159, 2020.
- [13] W. L. Hamilton, R. Ying, and J. Leskovec. Inductive representation learning on large graphs. *arXiv*, abs/1706.02216, 2017.
- [14] Y. Hou, J. Zhang, J. Cheng, K. Ma, R. T. Ma, H. Chen, and M.-C. Yang. Measuring and improving the use of graph information in graph neural networks. In *International Conference on Learning Representations*, 2019.
- [15] D. P. Kingma and J. Ba. Adam: A method for stochastic optimization. *arXiv preprint arXiv:1412.6980*, 2014.
- [16] T. N. Kipf and M. Welling. Semi-supervised classification with graph convolutional networks. *arXiv*, abs/1609.02907, 2016.
- [17] J. Klicpera, A. Bojchevski, and S. Günnemann. Predict then propagate: Graph neural networks meet personalized pagerank. *arXiv preprint arXiv:1810.05997*, 2018.
- [18] A. Krizhevsky, I. Sutskever, and G. E. Hinton. Imagenet classification with deep convolutional neural networks. In *Advances in neural information processing systems*, pages 1097–1105, 2012.
- [19] Y. LeCun, Y. Bengio, and G. Hinton. Deep learning. *nature*, 521(7553):436, 2015.

- [20] Y. LeCun, L. Bottou, Y. Bengio, P. Haffner, et al. Gradient-based learning applied to document recognition. *Proceedings of the IEEE*, 86(11):2278–2324, 1998.
- [21] Q. Li, Z. Han, and X. Wu. Deeper insights into graph convolutional networks for semi-supervised learning. *arXiv*, abs/1801.07606, 2018.
- [22] D. Lim, X. Li, F. Hohne, and S.-N. Lim. New benchmarks for learning on non-homophilous graphs. *arXiv preprint arXiv:2104.01404*, 2021.
- [23] M. Liu, Z. Wang, and S. Ji. Non-local graph neural networks. *arXiv preprint arXiv:2005.14612*, 2020.
- [24] I. Loshchilov and F. Hutter. Decoupled weight decay regularization. *arXiv preprint arXiv:1711.05101*, 2017.
- [25] S. Luan, M. Zhao, X.-W. Chang, and D. Precup. Break the ceiling: Stronger multi-scale deep graph convolutional networks. *arXiv preprint arXiv:1906.02174*, 2019.
- [26] T. Maehara. Revisiting graph neural networks: All we have is low-pass filters. *arXiv preprint arXiv:1905.09550*, 2019.
- [27] M. McPherson, L. Smith-Lovin, and J. M. Cook. Birds of a feather: Homophily in social networks. *Annual review of sociology*, 27(1):415–444, 2001.
- [28] Y. Min, F. Wenkel, and G. Wolf. Scattering gcnn: Overcoming oversmoothness in graph convolutional networks. *arXiv preprint arXiv:2003.08414*, 2020.
- [29] H. Pei, B. Wei, K. C.-C. Chang, Y. Lei, and B. Yang. Geom-gcn: Geometric graph convolutional networks. *arXiv preprint arXiv:2002.05287*, 2020.
- [30] F. Scarselli, M. Gori, A. C. Tsoi, M. Hagenbuchner, and G. Monfardini. The graph neural network model. *IEEE transactions on neural networks*, 20(1):61–80, 2008.
- [31] P. Velickovic, G. Cucurull, A. Casanova, A. Romero, P. Lio, and Y. Bengio. Graph attention networks. *arXiv*, abs/1710.10903, 2017.
- [32] F. Wu, T. Zhang, A. H. d. Souza Jr, C. Fifty, T. Yu, and K. Q. Weinberger. Simplifying graph convolutional networks. *arXiv preprint arXiv:1902.07153*, 2019.
- [33] K. Xu, C. Li, Y. Tian, T. Sonobe, K.-i. Kawarabayashi, and S. Jegelka. Representation learning on graphs with jumping knowledge networks. In J. Dy and A. Krause, editors, *Proceedings of the 35th International Conference on Machine Learning*, volume 80 of *Proceedings of Machine Learning Research*, pages 5453–5462. PMLR, 10–15 Jul 2018.
- [34] Y. Yan, M. Hashemi, K. Swersky, Y. Yang, and D. Koutra. Two sides of the same coin: Heterophily and oversmoothing in graph convolutional neural networks. *arXiv preprint arXiv:2102.06462*, 2021.
- [35] J. Zhu, R. A. Rossi, A. Rao, T. Mai, N. Lipka, N. K. Ahmed, and D. Koutra. Graph neural networks with heterophily. *arXiv preprint arXiv:2009.13566*, 2020.
- [36] J. Zhu, Y. Yan, L. Zhao, M. Heimann, L. Akoglu, and D. Koutra. Beyond homophily in graph neural networks: Current limitations and effective designs. *Advances in Neural Information Processing Systems*, 33, 2020.

## Checklist

### 1. For all authors...

- (a) Do the main claims made in the abstract and introduction accurately reflect the paper's contributions and scope? [Yes]
- (b) Did you describe the limitations of your work? [Yes] In the Appendix F, we discuss cases that high-pass filter cannot tackle.
- (c) Did you discuss any potential negative societal impacts of your work? [No] It is in Section 8, we have not come up with significant social negative impact.
- (d) Have you read the ethics review guidelines and ensured that your paper conforms to them? [Yes]

### 2. If you are including theoretical results...

- (a) Did you state the full set of assumptions of all theoretical results? [Yes] In Section 3&4, we mainly define a new homophily metric and it is followed by two theorems.
- (b) Did you include complete proofs of all theoretical results? [Yes] In Appendix B&C&D, we justify the new metric and two theorems.

### 3. If you ran experiments...

- (a) Did you include the code, data, and instructions needed to reproduce the main experimental results (either in the supplemental material or as a URL)? [Yes] The settings are provided in details and the source code is submitted in the supplemental material.
- (b) Did you specify all the training details (e.g., data splits, hyperparameters, how they were chosen)? [Yes] In Section 6, we specify model details.
- (c) Did you report error bars (e.g., with respect to the random seed after running experiments multiple times)? [Yes] We include average test accuracy of times of running with standard deviation.
- (d) Did you include the total amount of compute and the type of resources used (e.g., type of GPUs, internal cluster, or cloud provider)? [Yes] We include hardware details in Appendix, which is not computationally expensive.

### 4. If you are using existing assets (e.g., code, data, models) or curating/releasing new assets...

- (a) If your work uses existing assets, did you cite the creators? [Yes] In Section 6, we specify the datasets with their data split sources in footnotes.
- (b) Did you mention the license of the assets? [No]
- (c) Did you include any new assets either in the supplemental material or as a URL? [No]
- (d) Did you discuss whether and how consent was obtained from people whose data you're using/curating? [No]
- (e) Did you discuss whether the data you are using/curating contains personally identifiable information or offensive content? [No] None included.

### 5. If you used crowdsourcing or conducted research with human subjects...

- (a) Did you include the full text of instructions given to participants and screenshots, if applicable? [No] None included.
- (b) Did you describe any potential participant risks, with links to Institutional Review Board (IRB) approvals, if applicable? [No] None included.
- (c) Did you include the estimated hourly wage paid to participants and the total amount spent on participant compensation? [No] None included.

## A Hyperparameters & Details of The Experiments

### A.1 Hyperparameters Searching Range for GNNs on Synthetic Graphs

| Hyperparameter Searching Range for Synthetic Experiments |      |                    |                                              |        |
|----------------------------------------------------------|------|--------------------|----------------------------------------------|--------|
| Models\Hyperparameters                                   | lr   | weight_decay       | dropout                                      | hidden |
| MLP-1                                                    | 0.05 | {5e-5, 1e-4, 5e-4} | -                                            | -      |
| SGC-1                                                    | 0.05 | {5e-5, 1e-4, 5e-4} | -                                            | -      |
| ACM-SGC-1                                                | 0.05 | {5e-5, 1e-4, 5e-4} | { 0.1, 0.2, 0.3, 0.4, 0.5, 0.6, 0.7,0.8,0.9} | -      |
| MLP-2                                                    | 0.05 | {5e-5, 1e-4, 5e-4} | { 0.1, 0.2, 0.3, 0.4, 0.5, 0.6, 0.7,0.8,0.9} | 64     |
| GCN                                                      | 0.05 | {5e-5, 1e-4, 5e-4} | { 0.1, 0.2, 0.3, 0.4, 0.5, 0.6, 0.7,0.8,0.9} | 64     |
| ACM-GCN                                                  | 0.05 | {5e-5, 1e-4, 5e-4} | { 0.1, 0.2, 0.3, 0.4, 0.5, 0.6, 0.7,0.8,0.9} | 64     |

Table 3: Hyperparameter Searching Range for Synthetic Experiments

### A.2 Hyperparameters Searching Range for GNNs on Ablation Study

| Hyperparameter Searching Range for Ablation Study |             |                                               |                                              |        |
|---------------------------------------------------|-------------|-----------------------------------------------|----------------------------------------------|--------|
| Models\Hyperparameters                            | lr          | weight_decay                                  | dropout                                      | hidden |
| SGC-LP+HP                                         | {0.05, 0.1} | {0, 5e-6, 1e-5, 5e-5, 1e-4, 5e-4, 1e-3, 5e-3} | -                                            | -      |
| SGC-LP+Identity                                   | {0.05, 0.1} | {0, 5e-6, 1e-5, 5e-5, 1e-4, 5e-4, 1e-3, 5e-3} | -                                            | -      |
| ACM-SGC-no adaptive mixing                        | {0.05, 0.1} | {0, 5e-6, 1e-5, 5e-5, 1e-4, 5e-4, 1e-3, 5e-3} | { 0.1, 0.2, 0.3, 0.4, 0.5, 0.6, 0.7,0.8,0.9} | -      |
| GCN-LP+HP                                         | {0.05, 0.1} | {0, 5e-6, 1e-5, 5e-5, 1e-4, 5e-4, 1e-3, 5e-3} | { 0.1, 0.2, 0.3, 0.4, 0.5, 0.6, 0.7,0.8,0.9} | 64     |
| GCN-LP+Identity                                   | {0.05, 0.1} | {0, 5e-6, 1e-5, 5e-5, 1e-4, 5e-4, 1e-3, 5e-3} | { 0.1, 0.2, 0.3, 0.4, 0.5, 0.6, 0.7,0.8,0.9} | 64     |
| ACM-GCN-no adaptive mixing                        | {0.05, 0.1} | {0, 5e-6, 1e-5, 5e-5, 1e-4, 5e-4, 1e-3, 5e-3} | { 0.1, 0.2, 0.3, 0.4, 0.5, 0.6, 0.7,0.8,0.9} | 64     |

Table 4: Hyperparameter Searching Range for Ablation Study

### A.3 Hyperparameters Searching Range for GNNs on Real-world Datasets

| Hyperparameter Searching Range for Real-world Datasets |                    |                                               |                                              |                                         |         |        |            |
|--------------------------------------------------------|--------------------|-----------------------------------------------|----------------------------------------------|-----------------------------------------|---------|--------|------------|
| Models\Hyperparameters                                 | lr                 | weight_decay                                  | dropout                                      | hidden                                  | head    | layers | JK type    |
| H2GCN                                                  | 0.01               | 0.001                                         | 0, 0.5                                       | {8, 16, 32, 64}                         | -       | {1, 2} | -          |
| MixHop                                                 | 0.01               | 0.001                                         | 0.5                                          | {8, 16, 32}                             | -       | {2, 3} | -          |
| GCN+JK                                                 | {0.1, 0.01, 0.001} | 0.001                                         | 0.5                                          | {4, 8, 16, 32, 64}                      | -       | 2      | {max, cat} |
| GAT+JK                                                 | {0.1, 0.01, 0.001} | 0.001                                         | 0.5                                          | {4, 8, 12, 32}                          | {2,4,8} | 2      | {max, cat} |
| SGC-1                                                  | {0.002,0.01,0.05}  | {0, 5e-6, 1e-5, 5e-5, 1e-4, 5e-4, 1e-3, 5e-3} | -                                            | -                                       | -       | -      | -          |
| SGC-2                                                  | {0.002,0.01,0.05}  | {0, 5e-6, 1e-5, 5e-5, 1e-4, 5e-4, 1e-3, 5e-3} | -                                            | -                                       | -       | -      | -          |
| GCN                                                    | {0.002,0.01,0.05}  | {0, 5e-6, 1e-5, 5e-5, 1e-4, 5e-4, 1e-3, 5e-3} | { 0.1, 0.2, 0.3, 0.4, 0.5, 0.6, 0.7,0.8,0.9} | 64                                      | -       | -      | -          |
| GraphSAGE                                              | {0.01,0.05}        | {1e-5, 5e-5, 1e-4, 5e-4, 1e-3, 5e-3}          | { 0.1, 0.2, 0.3, 0.4, 0.5, 0.6, 0.7,0.8,0.9} | 8 for Deezer and YelpChi, 64 for others | -       | -      | -          |
| ACM-SGC-1                                              | {0.002,0.01,0.05}  | {0, 5e-6, 1e-5, 5e-5, 1e-4, 5e-4, 1e-3, 5e-3} | { 0.1, 0.2, 0.3, 0.4, 0.5, 0.6, 0.7,0.8,0.9} | -                                       | -       | -      | -          |
| ACM-SGC-2                                              | {0.002,0.01,0.05}  | {0, 5e-6, 1e-5, 5e-5, 1e-4, 5e-4, 1e-3, 5e-3} | { 0.1, 0.2, 0.3, 0.4, 0.5, 0.6, 0.7,0.8,0.9} | -                                       | -       | -      | -          |
| ACM-GCN                                                | {0.002,0.01,0.05}  | {0, 5e-6, 1e-5, 5e-5, 1e-4, 5e-4, 1e-3, 5e-3} | { 0.1, 0.2, 0.3, 0.4, 0.5, 0.6, 0.7,0.8,0.9} | 64                                      | -       | -      | -          |
| ACM-SAGE                                               | {0.01,0.05}        | {1e-5, 5e-5, 1e-4, 5e-4, 1e-3, 5e-3}          | { 0.1, 0.2, 0.3, 0.4, 0.5, 0.6, 0.7,0.8,0.9} | 8 for Deezer and YelpChi, 64 for others | -       | -      | -          |

Table 5: Hyperparameter Searching Range for Real-world Datasets

### A.4 Computing Resources

For all experiments on synthetic datasets and real-world datasets, we use NVidia V100 GPUs with 16/32GB GPU memory, 8-core CPU, 16G Memory. The software implementation is based on PyTorch and PyTorch Geometric [9].

## 438 B Details of Gradient Calculation in (5)

### 439 B.1 Derivation in Matrix Form

440 In output layer, we have

$$Y = \text{softmax}(\hat{A}XW) \equiv \text{softmax}(Y') = (\exp(Y')\mathbf{1}_C\mathbf{1}_C^T)^{-1} \odot \exp(Y') > 0$$

$$\mathcal{L} = -\text{trace}(Z^T \log Y)$$

441 where  $\mathbf{1}_C \in \mathcal{R}^{C \times 1}$ ,  $(\cdot)^{-1}$  is point-wise inverse function and each element of  $Y$  is positive. Then

$$d\mathcal{L} = -\text{trace}(Z^T((Y)^{-1} \odot dY)) = -\text{trace}\left(Z^T \left((\text{softmax}(Y'))^{-1} \odot d\text{softmax}(Y')\right)\right)$$

442 Note that

$$\begin{aligned} d\text{softmax}(Y') &= -(\exp(Y')\mathbf{1}_C\mathbf{1}_C^T)^{-2} \odot [(\exp(Y') \odot dY')\mathbf{1}_C\mathbf{1}_C^T] \odot \exp(Y') \\ &\quad + (\exp(Y')\mathbf{1}_C\mathbf{1}_C^T)^{-1} \odot (\exp(Y') \odot dY') \\ &= -\text{softmax}(Y') \odot (\exp(Y')\mathbf{1}_C\mathbf{1}_C^T)^{-1} \odot [(\exp(Y') \odot dY')\mathbf{1}_C\mathbf{1}_C^T] \\ &\quad + \text{softmax}(Y') \odot dY' \\ &= \text{softmax}(Y') \odot \left(-(\exp(Y')\mathbf{1}_C\mathbf{1}_C^T)^{-1} \odot [(\exp(Y') \odot dY')\mathbf{1}_C\mathbf{1}_C^T] + dY'\right) \end{aligned}$$

443 Then,

$$\begin{aligned} d\mathcal{L} &= -\text{trace}\left(Z^T \left((\text{softmax}(Y'))^{-1} \odot \left[\text{softmax}(Y') \odot \left(-(\exp(Y')\mathbf{1}_C\mathbf{1}_C^T)^{-1} \odot [(\exp(Y') \odot dY')\mathbf{1}_C\mathbf{1}_C^T] + dY'\right)\right]\right)\right) \\ &= -\text{trace}\left(Z^T \left(-(\exp(Y')\mathbf{1}_C\mathbf{1}_C^T)^{-1} \odot [(\exp(Y') \odot dY')\mathbf{1}_C\mathbf{1}_C^T] + dY'\right)\right) \\ &= \text{trace}\left(\left((Z \odot (\exp(Y')\mathbf{1}_C\mathbf{1}_C^T)^{-1})\mathbf{1}_C\mathbf{1}_C^T\right)^T [\exp(Y') \odot dY'] - Z^T dY'\right) \\ &= \text{trace}\left(\left(\exp(Y') \odot \left((Z \odot (\exp(Y')\mathbf{1}_C\mathbf{1}_C^T)^{-1})\mathbf{1}_C\mathbf{1}_C^T\right)\right)^T dY' - Z^T dY'\right) \\ &= \text{trace}\left(\left(\exp(Y') \odot (\exp(Y')\mathbf{1}_C\mathbf{1}_C^T)^{-1}\right)^T dY' - Z^T dY'\right) \\ &= \text{trace}((\text{softmax}(Y') - Z)^T dY') \end{aligned}$$

444 where the 4-th equation holds due to  $\left(Z \odot (\exp(Y')\mathbf{1}_C\mathbf{1}_C^T)^{-1}\right)\mathbf{1}_C\mathbf{1}_C^T = (\exp(Y')\mathbf{1}_C\mathbf{1}_C^T)^{-1}$ . Thus,  
445 we have

$$\frac{d\mathcal{L}}{dY'} = \text{softmax}(Y') - Z = Y - Z$$

446 For  $Y'$  and  $W$ , we have

$$dY' = \hat{A}X dW \text{ and } d\mathcal{L} = \text{trace}\left(\frac{d\mathcal{L}}{dY'}^T dY'\right) = \text{trace}\left(\frac{d\mathcal{L}}{dY'}^T \hat{A}X dW\right) = \text{trace}\left(\frac{d\mathcal{L}}{dW}^T dW\right)$$

447 To get  $\frac{d\mathcal{L}}{dW}$  we have,

$$\frac{d\mathcal{L}}{dW} = X^T \hat{A}^T \frac{d\mathcal{L}}{dY'} = X^T \hat{A}^T (Y - Z) \quad (14)$$

448 **B.2 Component-wise Derivation**

449 Denote  $\tilde{X} = XW$ . We rewrite  $\mathcal{L}$  as follows:

$$\begin{aligned}
\mathcal{L} &= -\text{trace} \left( Z^T \log \left( (\exp(Y') \mathbf{1}_C \mathbf{1}_C^T)^{-1} \odot \exp(Y') \right) \right) \\
&= -\text{trace} \left( Z^T \left( -\log(\exp(Y') \mathbf{1}_C \mathbf{1}_C^T) + Y' \right) \right) \\
&= -\text{trace} \left( Z^T Y' \right) + \text{trace} \left( Z^T \log \left( \exp(Y') \mathbf{1}_C \mathbf{1}_C^T \right) \right) \\
&= -\text{trace} \left( Z^T \hat{A} X W \right) + \text{trace} \left( Z^T \log \left( \exp(Y') \mathbf{1}_C \mathbf{1}_C^T \right) \right) \\
&= -\text{trace} \left( Z^T \hat{A} X W \right) + \text{trace} \left( \mathbf{1}_C^T \log \left( \exp(Y') \mathbf{1}_C \right) \right) \\
&= -\sum_{i=1}^N \sum_{j \in \mathcal{N}_i} \hat{A}_{i,j} Z_{i,:} \tilde{X}_{j,:}^T + \sum_{i=1}^N \log \left( \sum_{c=1}^C \exp \left( \sum_{j \in \mathcal{N}_i} \hat{A}_{i,j} \tilde{X}_{j,c} \right) \right) \\
&= -\sum_{i=1}^N \log \left( \exp \left( \sum_{c=1}^C \sum_{j \in \mathcal{N}_i} \hat{A}_{i,j} Z_{i,c} \tilde{X}_{j,c} \right) \right) + \sum_{i=1}^N \log \left( \sum_{c=1}^C \exp \left( \sum_{j \in \mathcal{N}_i} \hat{A}_{i,j} \tilde{X}_{j,c} \right) \right) \\
&= -\sum_{i=1}^N \log \frac{\exp \left( \sum_{c=1}^C \sum_{j \in \mathcal{N}_i} \hat{A}_{i,j} Z_{i,c} \tilde{X}_{j,c} \right)}{\left( \sum_{c=1}^C \exp \left( \sum_{j \in \mathcal{N}_i} \hat{A}_{i,j} \tilde{X}_{j,c} \right) \right)}
\end{aligned}$$

450 Note that  $\sum_{c=1}^C Z_{j,c} = 1$  for any  $j$ . Consider the derivation of  $\mathcal{L}$  over  $\tilde{X}_{j',c'}$ :

$$\begin{aligned}
&\frac{d\mathcal{L}}{d\tilde{X}_{j',c'}} \\
&= -\sum_{i=1}^N \frac{\sum_{c=1}^C \exp \left( \sum_{j \in \mathcal{N}_i} \hat{A}_{i,j} \tilde{X}_{j,c} \right)}{\exp \left( \sum_{c=1}^C \sum_{j \in \mathcal{N}_i} \hat{A}_{i,j} Z_{i,c} \tilde{X}_{j,c} \right)} \\
&\quad \times \left( \frac{\left( \hat{A}_{i,j'} Z_{i,c'} \right) \exp \left( \sum_{c=1}^C \sum_{j \in \mathcal{N}_i} \hat{A}_{i,j} Z_{i,c} \tilde{X}_{j,c} \right) \left( \sum_{c=1}^C \exp \left( \sum_{j \in \mathcal{N}_i} \hat{A}_{i,j} \tilde{X}_{j,c} \right) \right)}{\left( \sum_{c=1}^C \exp \left( \sum_{j \in \mathcal{N}_i} \hat{A}_{i,j} \tilde{X}_{j,c} \right) \right)^2} \right. \\
&\quad \left. - \frac{\left( \hat{A}_{i,j'} \right) \exp \left( \sum_{c=1}^C \sum_{j \in \mathcal{N}_i} \hat{A}_{i,j} Z_{i,c} \tilde{X}_{j,c} \right) \left( \exp \left( \sum_{j \in \mathcal{N}_i} \hat{A}_{i,j} \tilde{X}_{j,c'} \right) \right)}{\left( \sum_{c=1}^C \exp \left( \sum_{j \in \mathcal{N}_i} \hat{A}_{i,j} \tilde{X}_{j,c} \right) \right)^2} \right) \\
&= -\sum_{i=1}^N \left( \frac{\left( \hat{A}_{i,j'} Z_{i,c'} \right) \left( \sum_{c=1}^C \exp \left( \sum_{j \in \mathcal{N}_i} \hat{A}_{i,j} \tilde{X}_{j,c} \right) \right) - \left( \hat{A}_{i,j'} \right) \left( \exp \left( \sum_{j \in \mathcal{N}_i} \hat{A}_{i,j} \tilde{X}_{j,c'} \right) \right)}{\left( \sum_{c=1}^C \exp \left( \sum_{j \in \mathcal{N}_i} \hat{A}_{i,j} \tilde{X}_{j,c} \right) \right)} \right)
\end{aligned}$$

$$\begin{aligned}
&= - \sum_{i=1}^N \left( \hat{A}_{i,j'} \frac{\left( \sum_{c=1, c \neq c'}^C (Z_{i,c'}) \exp\left( \sum_{j \in \mathcal{N}_i} \hat{A}_{i,j} \tilde{X}_{j,c} \right) \right) + (Z_{i,c'} - 1) \left( \exp\left( \sum_{j \in \mathcal{N}_i} \hat{A}_{i,j} \tilde{X}_{j,c'} \right) \right)}{\left( \sum_{c=1}^C \exp\left( \sum_{j \in \mathcal{N}_i} \hat{A}_{i,j} \tilde{X}_{j,c} \right) \right)} \right) \\
&= - \sum_{i=1}^N \hat{A}_{i,j'} \left( Z_{i,c'} \hat{P}(Y_i \neq c') + (Z_{i,c'} - 1) \hat{P}(Y_i = c') \right) \\
&= - \sum_{i=1}^N \hat{A}_{i,j'} \left( Z_{i,c'} - \hat{P}(Y_i = c') \right)
\end{aligned}$$

451 Writing the above in matrix form, we have

$$\frac{d\mathcal{L}}{d\tilde{X}} = \hat{A}(Z - Y), \quad \frac{d\mathcal{L}}{d\tilde{W}} = X^T \hat{A}^T (Z - Y), \quad \Delta Y' \propto \hat{A} X X^T \hat{A}^T (Z - Y) \quad (15)$$

## 452 C Proof of Theorem 1

453 *Proof.* According to the given assumptions, for node  $v$ , the expectation of the number of intra-class  
454 edges is  $dh$  (here the self-loop edge introduced by  $d_{\text{intra}} = \hat{A}_{\text{rw}}$  is not counted) and inter-class edges  
455 is  $(1-h)d$ . Thus, we have  $\mathbb{E}[d_v] = d$  for all nodes. Suppose there are  $C \geq 2$  classes. Consider  
456 matrix  $\hat{A}Z$ ,

$$\mathbb{E}[(\hat{A}Z)_{v,c}] = \mathbb{E}\left[\sum_{k \in \mathcal{V}} \hat{A}_{v,k} \mathbf{1}_{\{Z_{k,:} = e_c^T\}}\right] = \begin{cases} \frac{hd+1}{d+1}, & v \text{ is in class } c \\ \frac{(1-h)d}{(C-1)(d+1)}, & v \text{ is not in class } c \end{cases}$$

457 where  $\mathbf{1}$  is the indicator function. For nodes  $v, u$ , we have

$$\begin{aligned}
\mathbb{E}[S(\hat{A}, Z)_{v,u}] &= \mathbb{E}[\langle (\hat{A}Z)_{v,:}, (\hat{A}Z)_{u,:} \rangle] \\
&= \begin{cases} \left(\frac{hd+1}{d+1}\right)^2 + \frac{((1-h)d)^2}{(C-1)(d+1)^2}, & u, v \text{ are in the same class} \\ \frac{2(hd+1)(1-h)d}{(C-1)(d+1)^2} + \frac{(C-2)(1-h)^2 d^2}{(C-1)^2 (d+1)^2}, & u, v \text{ are in different classes} \end{cases}
\end{aligned}$$

458 For nodes  $u_1, u_2$ , and  $v$ , where  $Z_{u_1,:} = Z_{v,:}$  and  $Z_{u_2,:} \neq Z_{v,:}$ ,

$$\begin{aligned}
g(h) &\equiv \mathbb{E}[S(\hat{A}, Z)_{v,u_1}] - \mathbb{E}[S(\hat{A}, Z)_{v,u_2}] \\
&= \frac{(C-1)^2(hd+1)^2 + (C-1)[(1-h)d]^2 - (C-1)(2(hd+1)(1-h)d) - (C-2)[(1-h)d]^2}{(C-1)^2(d+1)^2} \\
&= \left( \frac{(C-1)(hd+1) - (1-h)d}{(C-1)(d+1)} \right)^2
\end{aligned}$$

459 Setting  $g(h) = 0$ , we obtain the optimal  $h$ :

$$h = \frac{d+1-C}{Cd} \quad (16)$$

460 For the data generation process in the synthetic experiments, we fix  $d_{\text{intra}}$ , then  $d = d_{\text{intra}}/h$ , which is  
461 a function of  $h$ . We change  $d$  in (16) to  $d_{\text{intra}}/h$ , leading to

$$h = \frac{d_{\text{intra}}/h + 1 - C}{Cd_{\text{intra}}/h} \quad (17)$$

It is easy to observe that  $h$  satisfying (17) still makes  $g(h) = 0$ , when  $d$  in  $g(h)$  is replaced by  $d_{\text{intra}}/h$ .  
From (17) we obtain the optimal  $h$  in terms of  $d_{\text{intra}}$ :

$$h = \frac{d_{\text{intra}}}{Cd_{\text{intra}} + C - 1}$$

462

□



## 463 D Proof of Theorem 2

464 *Proof.* Define  $W_v^c = (\hat{A}Z)_{v,c}$ . Then,

$$W_v^c = \sum_{k \in \mathcal{V}} \hat{A}_{v,k} \mathbf{1}_{\{Z_{k,:} = e_c^T\}} \in [0, 1], \quad \sum_{c=1}^C W_v^c = 1$$

465 Note that

$$S(I - \hat{A}, Z) = (I - \hat{A})ZZ^T(I - \hat{A})^T = ZZ^T + \hat{A}ZZ^T\hat{A}^T - \hat{A}ZZ^T - ZZ^T\hat{A}^T \quad (18)$$

466 For any node  $v$ , let the class  $v$  belongs to be denoted by  $c_v$ . For two nodes  $v, u$ , if  $Z_{v,:} \neq Z_{u,:}$ , we  
467 have

$$\begin{aligned} (ZZ^T)_{v,u} &= 0 \\ (\hat{A}ZZ^T\hat{A}^T)_{v,u} &= \sum_{c=1}^C W_v^c W_u^c \\ (\hat{A}ZZ^T)_{v,u} &= W_v^{c_u} \\ (ZZ^T\hat{A}^T)_{v,u} &= (\hat{A}ZZ^T)_{u,v} = W_u^{c_v} \end{aligned}$$

468 Then, from (18) it follows that

$$(S(I - \hat{A}, Z))_{v,u} = \sum_{c=1}^C W_v^c W_u^c - W_v^{c_u} - W_u^{c_v}$$

469 When  $C = 2$ ,

$$S(I - \hat{A}, Z)_{v,u} = W_v^{c_u}(W_u^{c_u} - 1) + W_u^{c_v}(W_v^{c_v} - 1) \leq 0$$

470 If  $Z_{v,:} = Z_{u,:}$ , i.e.,  $c_v = c_u$ , we have

$$\begin{aligned} (ZZ^T)_{v,u} &= 1 \\ (\hat{A}ZZ^T\hat{A}^T)_{v,u} &= \sum_{c=1}^C W_v^c W_u^c \\ (\hat{A}ZZ^T)_{v,u} &= W_v^{c_v} \\ (ZZ^T\hat{A}^T)_{v,u} &= (\hat{A}ZZ^T)_{u,v} = W_u^{c_u} = W_u^{c_v} \end{aligned}$$

471 Then, from (18) it follows that

$$\begin{aligned} S(I - \hat{A}, Z)_{v,u} &= 1 + \sum_{c=1}^C W_v^c W_u^c - W_v^{c_v} - W_u^{c_v} \\ &= \sum_{c=1, c \neq c_v}^C W_v^c W_u^c + 1 + W_v^{c_v} W_u^{c_v} - W_v^{c_v} - W_u^{c_v} \\ &= \sum_{c=1, c \neq c_v}^C W_v^c W_u^c + (1 - W_v^{c_v})(1 - W_u^{c_v}) \geq 0 \end{aligned}$$

472 Thus, if  $C = 2$ , for any  $v \in \mathcal{V}$ , if  $Z_{u,:} \neq Z_{v,:}$ , we have  $S(I - \hat{A}, Z)_{v,u} \leq 0$ ; if  $Z_{u,:} = Z_{v,:}$ , we have  
473  $S(I - \hat{A}, Z)_{v,u} \geq 0$ . Apparently, the two conditions in (10) are satisfied. Thus  $v$  is diversification  
474 distinguishable and  $\text{DD}_{\hat{A}, X}(\mathcal{G}) = 1$ . The theorem is proved.  $\square$

## 475 E Model Comparison on Synthetic Graphs

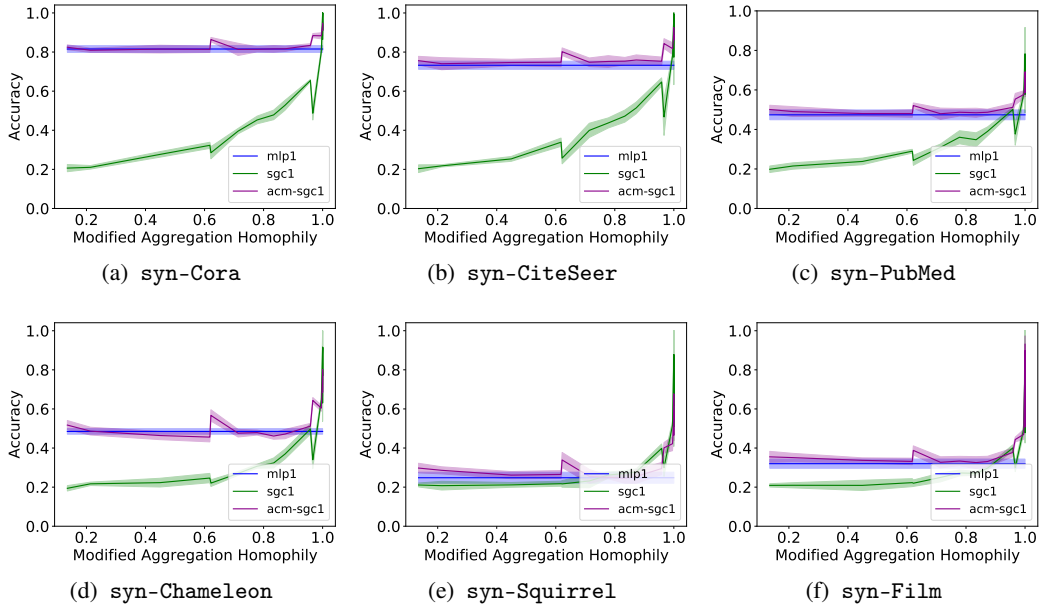

Figure 4: Comparison of test accuracy (mean  $\pm$  std) of MLP-1, SGC-1 and ACM-SGC-1 on synthetic datasets

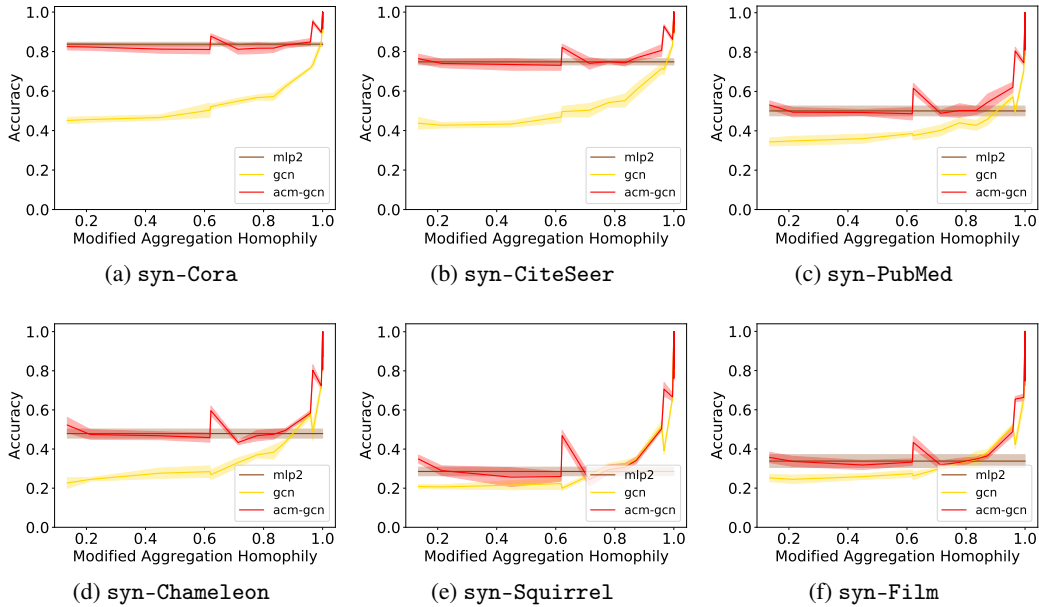

Figure 5: Comparison of test accuracy (mean  $\pm$  std) of MLP-2, GCN and ACM-GCN on synthetic datasets

476 In order to separate the effects of nonlinearity and graph structure, we compare sgc with 1 hop  
 477 (sgc-1) with MLP-1(linear model). For GCN which includes nonlinearity, we use MLP-2 as the  
 478 graph-agnostic baseline model. We train the above GNN models, graph-agnostic baseline models and

ACM-GNN models on all synthetic datasets and plot the mean test accuracy with standard deviation on each dataset. From Figure 4 and Figure 5, we can see that on each  $H_{\text{agg}}^M(\mathcal{G})$  level, ACM-GNNs will not underperform GNNs and graph-agnostic models. But when  $H_{\text{agg}}^M(\mathcal{G})$  is small, GNNs will be outperformed by graph-agnostic models by a large margin. This demonstrate the advantage of the ACM framework.

## F Discussion of The Limitations of Diversification Operation

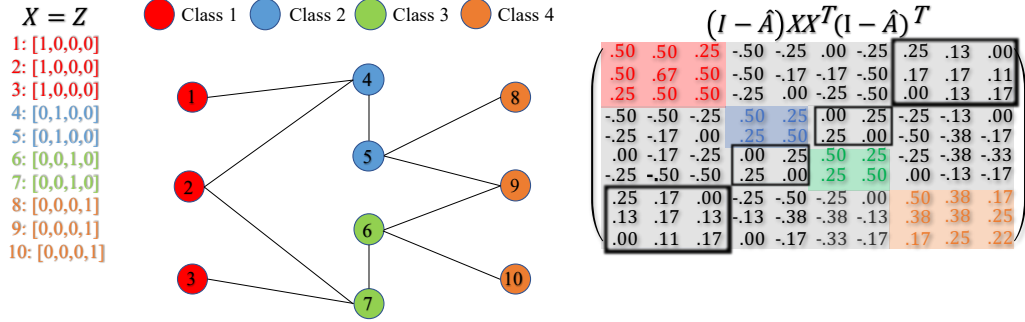

Figure 6: Example of the case (the area in black box) that HP filter does not work well for harmful heterophily

From the area in black boxes in Figure 6 we can see that nodes in class 1 and 4 assign non-negative weights to each other; nodes in class 2 and 3 assign non-negative weights to each other as well. This is because the surrounding differences of class 1 are similar as class 4, so are class 2 and 3. In real-world applications, when nodes in several small clusters connect to a large cluster, the surrounding differences of the nodes in the small clusters will become similar. In such case, HP filter are not able to distinguish the nodes from different small clusters.

## G Estimation of The Similarity, Homophily and $DD_{\hat{A},X}(\mathcal{G})$ Metrics.

In most real-world applications, not all labels are available to calculate the dataset statistics. In this section, We randomly split the data into 60%/20%/20% for training/validation/test, and only use the training labels for the estimation of the statistics. We repeat each estimation for 10 times and report the mean with standard deviation. The results are shown in table 6.

|                                       | Cornell         | Wisconsin       | Texas           | Film            | Chameleon       | Squirrel        | Cora            | CiteSeer        | PubMed          |
|---------------------------------------|-----------------|-----------------|-----------------|-----------------|-----------------|-----------------|-----------------|-----------------|-----------------|
| $H_{\text{agg}}(\mathcal{G})$         | 0.9016          | 0.8884          | 0.847           | 0.8411          | 0.805           | 0.6783          | 0.9952          | 0.9913          | 0.9716          |
| $S_{\text{agg}}(S(\hat{A}, X))$       | 0.8251          | 0.7769          | 0.6557          | 0.5118          | 0.8292          | 0.7216          | 0.9439          | 0.9393          | 0.8623          |
| $S_{\text{agg}}(S(I, X))$             | 0.9672          | 0.8287          | 0.9672          | 0.5405          | 0.7931          | 0.701           | 0.9103          | 0.9315          | 0.8823          |
| $DD_{\hat{A},X}(\mathcal{G})$         | 0.3497          | 0.6096          | 0.459           | 0.3279          | 0.3109          | 0.2711          | 0.2681          | 0.4124          | 0.1889          |
| $\hat{H}_{\text{agg}}(\mathcal{G})$   | 0.9046 ± 0.0282 | 0.9147 ± 0.0260 | 0.8596 ± 0.0299 | 0.8451 ± 0.0041 | 0.8041 ± 0.0078 | 0.6788 ± 0.0077 | 0.9959 ± 0.0011 | 0.9907 ± 0.0015 | 0.9724 ± 0.0015 |
| $\hat{S}_{\text{agg}}(S(\hat{A}, X))$ | 0.8266 ± 0.0526 | 0.8280 ± 0.0351 | 0.6835 ± 0.0498 | 0.5345 ± 0.0421 | 0.8433 ± 0.0070 | 0.7352 ± 0.0132 | 0.9487 ± 0.0023 | 0.9451 ± 0.0038 | 0.8626 ± 0.0021 |
| $\hat{S}_{\text{agg}}(S(I, X))$       | 0.9752 ± 0.0174 | 0.8680 ± 0.0270 | 0.9661 ± 0.0336 | 0.5438 ± 0.0184 | 0.8257 ± 0.0050 | 0.7472 ± 0.0089 | 0.9204 ± 0.0044 | 0.9441 ± 0.0036 | 0.8835 ± 0.0019 |
| $\hat{DD}_{\hat{A},X}(\mathcal{G})$   | 0.3936 ± 0.0663 | 0.6073 ± 0.0436 | 0.4817 ± 0.0762 | 0.3300 ± 0.0136 | 0.3329 ± 0.0151 | 0.3021 ± 0.0101 | 0.3198 ± 0.0225 | 0.4424 ± 0.0136 | 0.1919 ± 0.0046 |

Table 6: Estimation of similarity metrics and diversification distinguishability with only training labels (mean ± std)

495

**Estimation** The statistics we estimate are  $H_{\text{agg}}(\mathcal{G})$ ,  $S_{\text{agg}}(S(\hat{A}, X))$ ,  $S_{\text{agg}}(S(I, X))$  and  $DD_{\hat{A},X}(\mathcal{G})$  and are denoted as  $\hat{H}_{\text{agg}}(\mathcal{G})$ ,  $\hat{S}_{\text{agg}}(S(\hat{A}, X))$ ,  $\hat{S}_{\text{agg}}(S(I, X))$  and  $\hat{DD}_{\hat{A},X}(\mathcal{G})$ . The two similarity scores  $S_{\text{agg}}(S(\hat{A}, X))$  and  $S_{\text{agg}}(S(I, X))$  measures the proportion of nodes, according to aggregated features and nodes features respectively, that will put larger weights on nodes in the

500 same class than in other classes. The higher values of  $S_{\text{agg}}(S(\hat{A}, X))$  and  $S_{\text{agg}}(S(I, X))$  indicates  
501 the better quality of aggregated features and nodes features.

502 **Analysis** From the reported results we can see that the estimations are accurate and the errors  
503 are in acceptable range, which means the proposed metrics and similarity scores can be accurately  
504 estimated with a subset of labels and this is important for real-world applications. Furthermore, we  
505 notice some interesting results, *e.g.*, the performance of GNNs and MLP are bad on *Squirrel* and *Film*,  
506 and according to the aggregation homophily values, the graph structure of *Film* is not quite harmful  
507 compared to other datasets, but its features and aggregated features are much worse than others; the  
508 features and aggregated features of *Squirrel* are not too bad, but its graph topology is more harmful  
509 than others. Combining the metrics defined in this paper together can help us separate different  
510 factors in graph structure and features and identify what might cause the performance degradations of  
511 GNNs.
